# Supplementary material
Source: ML conference proceedings conference paper supplement (https://openaccess.thecvf.com/content/CVPR2026/html/Zeng_Gaussian_Splatting-based_Low-Rank_CVPR_2026_paper.html)
Supplement: Supplementary file 1 [file Zeng_Gaussian_Splatting-based_Low-Rank_CVPR_2026_supplemental.pdf]

# Gaussian Splatting-based Low-rank Tensor Representation for Multi-Dimensional Image Recovery

## Supplementary Material

### 1. Proof of Lemma 1

*Proof. 1).* **2D Gaussian splatting can explicitly generate arbitrary latent tensor  $\mathcal{A}$**  when the parameter  $\theta_{\mathcal{A}}$  satisfies:

- (i)  $N = HW$ ,  $\boldsymbol{\mu}_j = (x, y)^\top$  with  $j = (x-1)W + y$  for  $j = 1, \dots, HW$ ;
- (ii)  $\boldsymbol{\Sigma}_j \rightarrow \mathbf{0}$ .

For notational simplicity, we let all covariances  $\boldsymbol{\Sigma}_j$  be equal to  $\bar{\boldsymbol{\Sigma}}$ . The latent tensor is given by:

$$\mathcal{A}(x', y') = \sum_{j=1}^{HW} \mathbf{c}_j \cdot \exp\left(-\frac{1}{2} \begin{pmatrix} x' \\ y' \end{pmatrix} - \boldsymbol{\mu}_j \right)^\top \bar{\boldsymbol{\Sigma}}^{-1} \begin{pmatrix} x' \\ y' \end{pmatrix} - \boldsymbol{\mu}_j \right), \quad (1)$$

To represent the spatial correspondence between the position  $\boldsymbol{\mu}_j$  and feature  $\mathbf{c}_j$  of each 2D Gaussian primitive, we denote  $\boldsymbol{\mu}_j = \boldsymbol{\mu}_h^w = (h, w)^\top$  and  $\mathbf{c}_j = \mathbf{c}_h^w$ , where  $j = (h-1)W + w$ . When  $\bar{\boldsymbol{\Sigma}}$  approaches the zero matrix, Eq. (1) simplifies to:

$$\begin{aligned} & \mathcal{A}(x', y') \\ &= \lim_{\bar{\boldsymbol{\Sigma}} \rightarrow \mathbf{0}} \sum_{j=1}^{HW} \mathbf{c}_j \cdot \exp\left(-\frac{1}{2} \begin{pmatrix} x' \\ y' \end{pmatrix} - \boldsymbol{\mu}_j \right)^\top \bar{\boldsymbol{\Sigma}}^{-1} \begin{pmatrix} x' \\ y' \end{pmatrix} - \boldsymbol{\mu}_j \right) \\ &= \lim_{\bar{\boldsymbol{\Sigma}} \rightarrow \mathbf{0}} \sum_{h=1}^H \sum_{w=1}^W \mathbf{c}_h^w \cdot \exp\left(-\frac{1}{2} \begin{pmatrix} x' \\ y' \end{pmatrix} - \boldsymbol{\mu}_h^w \right)^\top \bar{\boldsymbol{\Sigma}}^{-1} \begin{pmatrix} x' \\ y' \end{pmatrix} - \boldsymbol{\mu}_h^w \right) \\ &= \lim_{\bar{\boldsymbol{\Sigma}} \rightarrow \mathbf{0}} \mathbf{c}_1^1 \exp\left(-\frac{1}{2} \begin{pmatrix} x' \\ y' \end{pmatrix} - \boldsymbol{\mu}_1^1 \right)^\top \bar{\boldsymbol{\Sigma}}^{-1} \begin{pmatrix} x' \\ y' \end{pmatrix} - \boldsymbol{\mu}_1^1 \right) + \dots + \\ & \quad \mathbf{c}_{x'}^{y'} \exp\left(-\frac{1}{2} \begin{pmatrix} x' \\ y' \end{pmatrix} - \boldsymbol{\mu}_{x'}^{y'} \right)^\top \bar{\boldsymbol{\Sigma}}^{-1} \begin{pmatrix} x' \\ y' \end{pmatrix} - \boldsymbol{\mu}_{x'}^{y'} \right) + \dots + \\ & \quad \mathbf{c}_H^W \exp\left(-\frac{1}{2} \begin{pmatrix} x' \\ y' \end{pmatrix} - \boldsymbol{\mu}_H^W \right)^\top \bar{\boldsymbol{\Sigma}}^{-1} \begin{pmatrix} x' \\ y' \end{pmatrix} - \boldsymbol{\mu}_H^W \right) \\ &= 0 + \dots + \mathbf{c}_{x'}^{y'} + \dots + 0 \\ &= \mathbf{c}_{x'}^{y'}. \end{aligned} \quad (2)$$

Finally, we obtain:

$$\mathcal{A}(x', y') = \mathbf{c}_{x'}^{y'} = \mathbf{c}_j, \quad \text{where } j = (x'-1)W + y'. \quad (3)$$

Here,  $\mathbf{c}_j$  is a learnable attribute of the 2D Gaussian primitive, and the 2D Gaussian splatting can explicitly generate an arbitrary latent tensor  $\mathcal{A}$ .

**2).** **1D Gaussian splatting can explicitly generate arbitrary transform matrix  $\mathbf{T}$**  when the parameter  $\theta_{\mathbf{T}}$  satisfies:

- (i)  $K = B$ ,  $\mu_k^r = k$  for  $k = 1, \dots, B$ ,  $r = 1, \dots, R$ .

- (ii)  $\sigma_k^r \rightarrow 0^+$ .

For notational simplicity, we let all variances  $\sigma_k^r$  be equal to  $\bar{\sigma}$ . The transform matrix is given by:

$$\mathbf{T}(z, r) = \sum_{k=1}^B c_k^r \cdot \exp\left(-\frac{(z-k)^2}{2\bar{\sigma}^2}\right). \quad (4)$$

As the variance  $\bar{\sigma}$  approaches zero from the right, Eq. (4) simplifies to:

$$\begin{aligned} \mathbf{T}(z, r) &= \lim_{\bar{\sigma} \rightarrow 0^+} \sum_{k=1}^B c_k^r \cdot \exp\left(-\frac{(z-k)^2}{2\bar{\sigma}^2}\right) \\ &= \lim_{\bar{\sigma} \rightarrow 0^+} c_1^r \cdot \exp\left(-\frac{(z-1)^2}{2\bar{\sigma}^2}\right) + \dots \\ & \quad + c_z^r \cdot \exp\left(-\frac{(z-z)^2}{2\bar{\sigma}^2}\right) + \dots \\ & \quad + c_B^r \cdot \exp\left(-\frac{(z-B)^2}{2\bar{\sigma}^2}\right) \\ &= 0 + \dots + c_z^r + \dots + 0 \\ &= c_z^r. \end{aligned} \quad (5)$$

Since  $c_z^r$  is a learnable attribute of the 1D Gaussian primitive, the 1D Gaussian splatting can explicitly generate an arbitrary transform matrix  $\mathbf{T}$ .

### 2. Proof of Theorem 1

*Proof.* Under the conditions of Lemma 1, the 2D and 1D Gaussian splatting can represent arbitrary latent tensor  $\mathcal{A}$  and arbitrary transform matrix  $\mathbf{T}$ . Let  $\mathcal{A}_{[r]} = \mathbf{U}_{[r]} \mathbf{S}_{[r]} \mathbf{V}_{[r]}^H$  with unitary matrices  $\mathbf{U}_{[r]}$ ,  $\mathbf{V}_{[r]}$  and diagonal matrix  $\mathbf{S}_{[r]}$ , and  $\mathbf{T}$  is any invertible transform matrix, then the proposed GSLR degrades to the classical t-SVD method.

### 3. The Impact of Hyperparameters

The proposed GSLR includes four hyperparameters: the numbers of 2D and 1D Gaussian splatting primitives (i.e.,  $N$  and  $K$ ), the trade-off parameter  $\lambda$  of the low-rank constraint, and the dimensionality  $R$  of the latent tensor.

To investigate the influence of these hyperparameters on multi-dimensional image recovery performance, we vary one parameter at a time while keeping the others fixed, and the corresponding PSNR results are shown in Fig. 1. The impact of the number of 2D and 1D Gaussian primitives (i.e.,  $N$  and  $K$ ) for the proposed GSLR are shown in Fig. 1 (a) and (b). Both parameters exhibit a similar pattern that

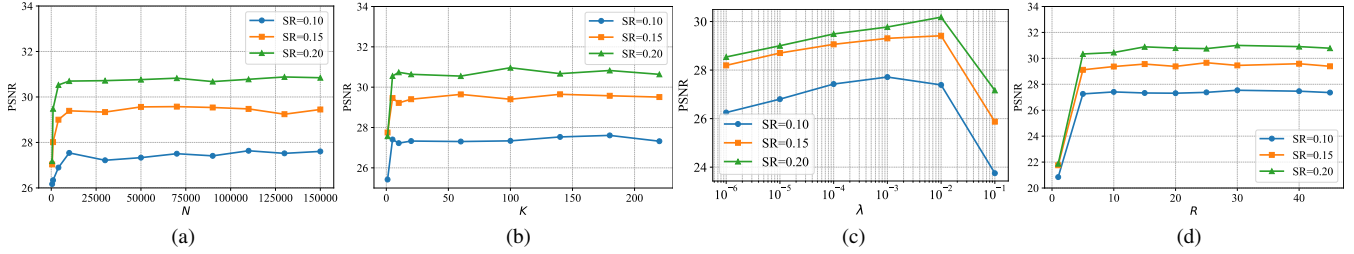

Figure 1. Quantitative performance with respect to different hyperparameter settings on *Toy* dataset under tube missing. (a) the number of 2D Gaussian primitives  $N$ , (b) the number of 1D Gaussian primitives  $K$ , (c) the trade-off parameter  $\lambda$ , and (d) the dimensionality  $R$  of the latent tensor along the third dimension.

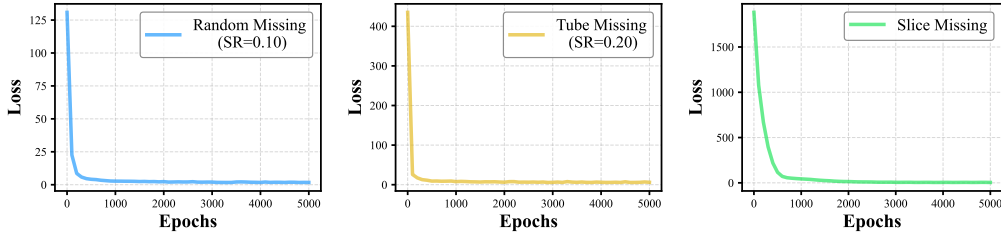

Figure 2. The loss function values versus iterations on *Toy* dataset under three missing scenarios.

the performance rapidly improves at small values and then stabilizes, indicating that GSLR is relatively robust to  $N$  and  $K$  once they reach a sufficient amounts. For the trade-off parameter  $\lambda$ , the PSNR improves as  $\lambda$  increases from a small value but begins to decline once  $\lambda$  excessively large as shown in Fig. 1 (c), which underscores the importance of selecting an appropriate value. For the dimensionality  $R$ , the PSNR results become relatively stable when  $R$  is sufficiently large as shown in Fig. 1 (d), suggesting that GSLR can achieve satisfactory performance across a broad range of values.

## 4. More Experimental Results

**Experimental Setup.** All experiments are conducted on a Linux platform equipped with an Intel Xeon E3-1231 v3 CPU, an NVIDIA RTX 2080 Ti GPU, CUDA 12.4, and PyTorch 2.8.0.

**Quantitative and Qualitative Results.** Quantitatively, as summarized in Tabs. 1 and 2, our method achieves state-of-the-art performance, consistently outperforming competing methods on both PSNR and SSIM metrics across all datasets. Qualitatively, the visual comparisons in Figs. 3 to 8 further validate our model’s superiority. Our approach generates reconstructions that are visually more faithful to the GT, capturing the local high-frequency information and structures more accurately than others, even in challenging scenarios with very low sampling rates.

**Numerical Convergence.** To evaluate the numerical convergence of the proposed GSLR, we plot the loss function values versus iterations on *Toy* dataset under three missing scenarios in Fig. 2. The loss function values decrease

rapidly in the initial iterations and then gradually stabilize, demonstrating the empirical convergence behavior.

## 5. Limitations and Future Work

The proposed GSLR enjoys a powerful representation capability for multi-dimensional images, though a few limitations remain that can be addressed in future work.

First, GSLR requires numerous Gaussian primitives to handle complex scenes. This enhances its ability to capture high-frequency information but also increases memory consumption. Future work could explore content-aware strategies to more accurately capture the high-frequency information while reducing memory usage. Second, we evaluated the representation capability of GSLR on multi-dimensional image recovery tasks in this paper. In future work, it could be extended to other multi-dimensional image tasks, such as multi-dimensional image compression, and even to higher-order data, such as videos and point clouds.

Table 1. The detailed quantitative results for random missing. The **best** and second-best values are highlighted.

| Method                                          | TNN  |        | TRLRF |        | TCTV  |               | HLRTF        |               | LRTFR        |               | FLRTF        |        | GSLR  |               |              |
|-------------------------------------------------|------|--------|-------|--------|-------|---------------|--------------|---------------|--------------|---------------|--------------|--------|-------|---------------|--------------|
| Data                                            | SR   | PSNR   | SSIM  | PSNR   | SSIM  | PSNR          | SSIM         | PSNR          | SSIM         | PSNR          | SSIM         | PSNR   | SSIM  | PSNR          | SSIM         |
| Color image<br><i>Plane</i><br>(512 × 512 × 3)  | 0.02 | 16.548 | 0.234 | 14.502 | 0.102 | <u>21.211</u> | <u>0.650</u> | 18.039        | 0.287        | 19.784        | 0.439        | 14.590 | 0.101 | <b>23.621</b> | <b>0.736</b> |
|                                                 | 0.05 | 19.042 | 0.360 | 18.148 | 0.277 | 23.744        | <u>0.723</u> | 21.152        | 0.451        | <u>23.766</u> | 0.637        | 19.242 | 0.362 | <b>26.030</b> | <b>0.809</b> |
|                                                 | 0.10 | 21.624 | 0.494 | 21.844 | 0.505 | 26.678        | <u>0.812</u> | 24.585        | 0.661        | <u>26.954</u> | 0.799        | 22.226 | 0.514 | <b>28.304</b> | <b>0.869</b> |
| Color image<br><i>Baboon</i><br>(512 × 512 × 3) | 0.02 | 13.934 | 0.096 | 13.324 | 0.082 | 15.408        | <u>0.231</u> | 14.228        | 0.121        | <u>16.374</u> | 0.185        | 12.954 | 0.079 | <b>17.793</b> | <b>0.286</b> |
|                                                 | 0.05 | 15.970 | 0.161 | 15.268 | 0.125 | 18.202        | <u>0.368</u> | 16.737        | 0.202        | <u>18.635</u> | 0.290        | 16.376 | 0.163 | <b>18.756</b> | <b>0.384</b> |
|                                                 | 0.10 | 17.440 | 0.257 | 17.722 | 0.268 | 20.190        | <u>0.515</u> | 18.688        | 0.365        | 19.569        | 0.398        | 18.154 | 0.287 | <b>20.408</b> | <b>0.522</b> |
| Color image<br><i>House</i><br>(512 × 512 × 3)  | 0.02 | 15.749 | 0.212 | 14.660 | 0.114 | 18.773        | <u>0.486</u> | 16.299        | 0.232        | <u>19.092</u> | 0.423        | 14.039 | 0.104 | <b>21.414</b> | <b>0.603</b> |
|                                                 | 0.05 | 18.018 | 0.333 | 18.047 | 0.306 | <u>21.651</u> | <u>0.628</u> | 19.077        | 0.374        | 21.570        | 0.571        | 18.390 | 0.354 | <b>23.228</b> | <b>0.704</b> |
|                                                 | 0.10 | 20.217 | 0.461 | 20.553 | 0.473 | 24.284        | <u>0.756</u> | 21.963        | 0.568        | 23.721        | 0.697        | 20.479 | 0.488 | <b>24.823</b> | <b>0.784</b> |
| Color image<br><i>Female</i><br>(256 × 256 × 3) | 0.02 | 16.443 | 0.232 | 15.212 | 0.116 | 20.403        | <u>0.535</u> | 17.784        | 0.292        | <u>21.531</u> | 0.474        | 15.081 | 0.127 | <b>23.906</b> | <b>0.659</b> |
|                                                 | 0.05 | 18.981 | 0.335 | 18.209 | 0.262 | 23.647        | <u>0.647</u> | 20.586        | 0.422        | <u>25.145</u> | <u>0.662</u> | 17.138 | 0.234 | <b>26.299</b> | <b>0.753</b> |
|                                                 | 0.10 | 21.291 | 0.464 | 21.738 | 0.452 | 26.514        | 0.738        | 23.196        | 0.572        | <u>27.042</u> | <u>0.751</u> | 21.796 | 0.475 | <b>28.156</b> | <b>0.815</b> |
| MSI<br><i>Toy</i><br>(256 × 256 × 31)           | 0.02 | 23.656 | 0.708 | 24.463 | 0.656 | 28.957        | <u>0.893</u> | 28.699        | 0.834        | <u>29.823</u> | 0.852        | 23.054 | 0.467 | <b>31.712</b> | <b>0.923</b> |
|                                                 | 0.05 | 27.368 | 0.822 | 31.325 | 0.867 | 33.631        | <u>0.951</u> | 34.691        | 0.948        | <u>34.676</u> | 0.943        | 30.564 | 0.858 | <b>37.148</b> | <b>0.983</b> |
|                                                 | 0.10 | 31.538 | 0.904 | 34.969 | 0.935 | 38.405        | <u>0.977</u> | <u>40.759</u> | 0.983        | 39.564        | 0.980        | 37.873 | 0.963 | <b>43.630</b> | <b>0.995</b> |
| MSI<br><i>Flowers</i><br>(256 × 256 × 31)       | 0.02 | 25.515 | 0.645 | 26.437 | 0.603 | 32.257        | <u>0.874</u> | 31.217        | 0.827        | <u>33.012</u> | 0.871        | 24.250 | 0.512 | <b>34.247</b> | <b>0.913</b> |
|                                                 | 0.05 | 28.853 | 0.757 | 31.779 | 0.804 | 36.287        | <u>0.937</u> | 36.971        | 0.940        | <u>37.717</u> | <u>0.945</u> | 32.137 | 0.823 | <b>40.736</b> | <b>0.979</b> |
|                                                 | 0.10 | 32.385 | 0.853 | 36.062 | 0.902 | 40.436        | 0.971        | <u>41.934</u> | 0.977        | 41.656        | <u>0.978</u> | 39.403 | 0.950 | <b>45.189</b> | <b>0.991</b> |
| MSI<br><i>Beads</i><br>(256 × 256 × 31)         | 0.02 | 18.092 | 0.277 | 17.941 | 0.279 | 23.353        | <u>0.700</u> | 20.649        | 0.487        | <u>23.288</u> | 0.669        | 17.580 | 0.301 | <b>24.461</b> | <b>0.751</b> |
|                                                 | 0.05 | 20.473 | 0.485 | 21.300 | 0.513 | 26.688        | <u>0.839</u> | 25.683        | 0.785        | <u>26.780</u> | 0.817        | 21.187 | 0.554 | <b>29.887</b> | <b>0.923</b> |
|                                                 | 0.10 | 23.636 | 0.689 | 27.272 | 0.796 | 30.282        | 0.920        | <u>31.364</u> | <u>0.930</u> | 30.294        | 0.893        | 27.492 | 0.809 | <b>34.750</b> | <b>0.974</b> |
| MSI<br><i>Feathers</i><br>(256 × 256 × 31)      | 0.02 | 23.250 | 0.629 | 24.007 | 0.527 | 29.370        | <u>0.876</u> | 28.518        | 0.818        | <u>29.488</u> | 0.846        | 20.056 | 0.342 | <b>31.231</b> | <b>0.935</b> |
|                                                 | 0.05 | 27.039 | 0.771 | 30.754 | 0.834 | 33.613        | <u>0.941</u> | <u>34.264</u> | 0.937        | 33.917        | 0.916        | 29.861 | 0.800 | <b>36.882</b> | <b>0.979</b> |
|                                                 | 0.10 | 30.918 | 0.871 | 34.820 | 0.919 | 37.958        | <u>0.972</u> | <u>39.627</u> | 0.977        | 38.451        | 0.969        | 36.476 | 0.939 | <b>41.524</b> | <b>0.989</b> |
| MSI<br><i>PaviaU</i><br>(256 × 256 × 80)        | 0.02 | 23.526 | 0.517 | 23.766 | 0.510 | 28.926        | 0.822        | 29.708        | 0.831        | <u>30.903</u> | <u>0.870</u> | 24.536 | 0.612 | <b>32.208</b> | <b>0.917</b> |
|                                                 | 0.05 | 27.261 | 0.736 | 29.968 | 0.825 | 32.975        | 0.922        | 35.602        | 0.951        | <u>35.696</u> | <u>0.955</u> | 33.318 | 0.906 | <b>37.010</b> | <b>0.971</b> |
|                                                 | 0.10 | 31.272 | 0.868 | 33.221 | 0.911 | 37.407        | 0.967        | 40.511        | 0.983        | <u>41.697</u> | <u>0.984</u> | 40.571 | 0.978 | <b>42.234</b> | <b>0.989</b> |

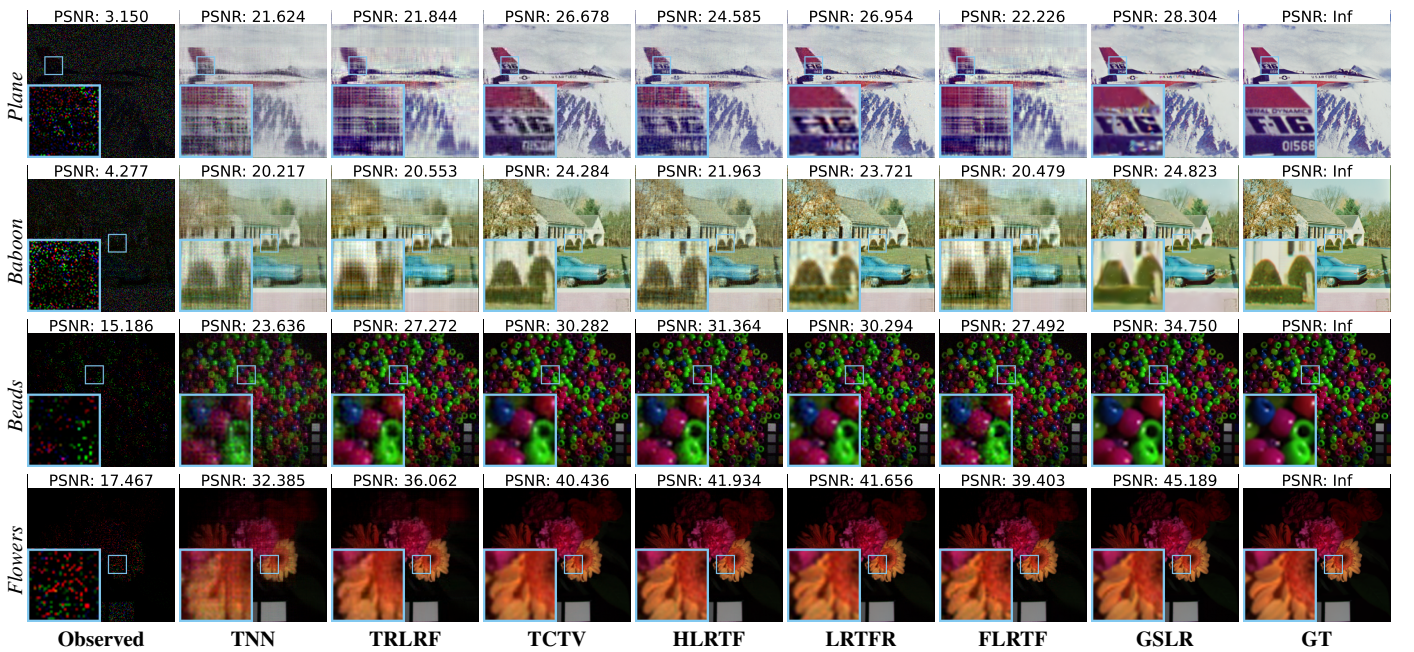

Figure 3. Reconstructed results and zoomed-in details by different methods under the random missing (SR = 0.10).

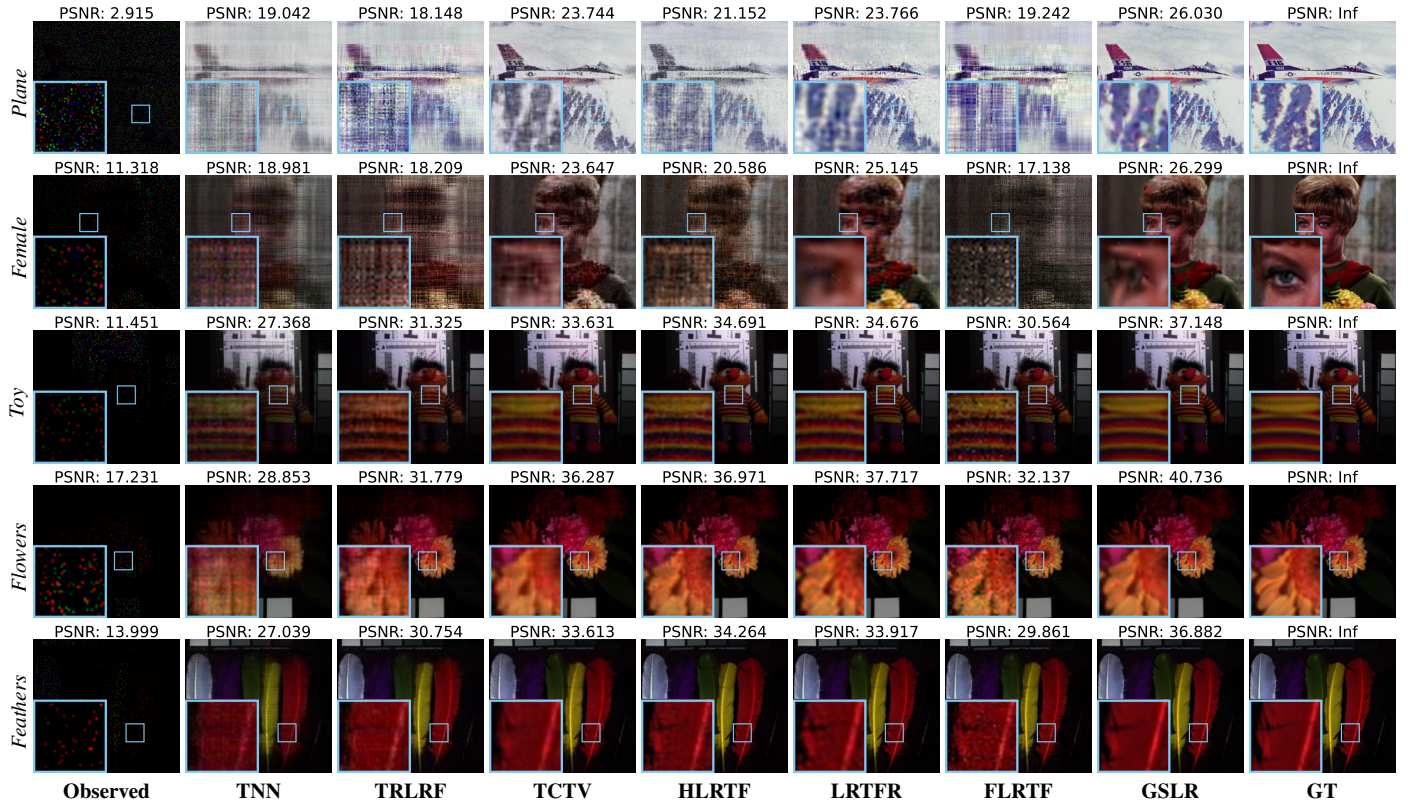

Figure 4. Reconstructed results and zoomed-in details by different methods under the random missing (SR = 0.05).

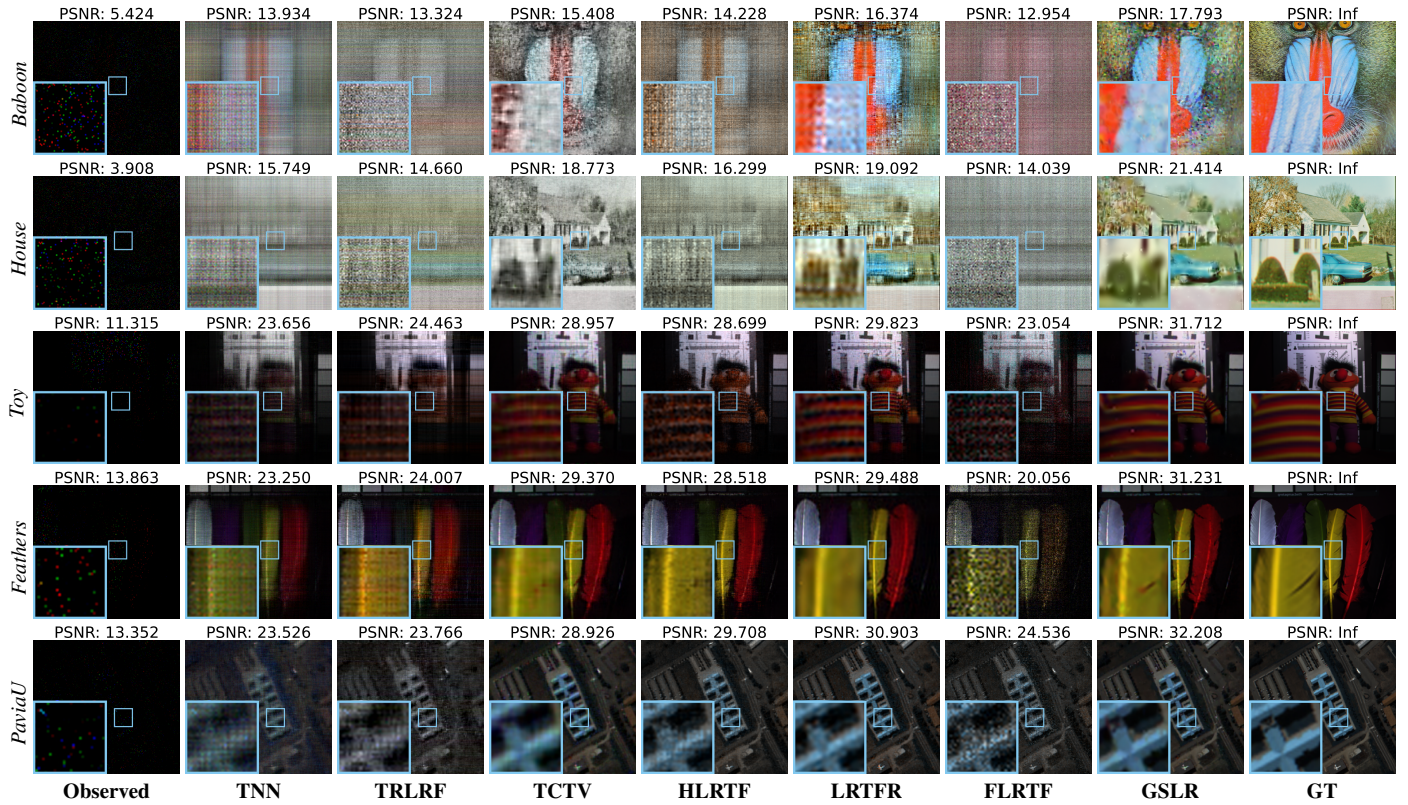

Figure 5. Reconstructed results and zoomed-in details by different methods under the random missing (SR = 0.02).

Table 2. The detailed quantitative results for tube missing. The **best** and **second-best** values are highlighted.

| Method           | TNN  |        | TRLRF |        | TCTV  |               | HLRTF        |        | LRTFR |        | FLRTF |        | GSLR  |               |              |
|------------------|------|--------|-------|--------|-------|---------------|--------------|--------|-------|--------|-------|--------|-------|---------------|--------------|
| Data             | SR   | PSNR   | SSIM  | PSNR   | SSIM  | PSNR          | SSIM         | PSNR   | SSIM  | PSNR   | SSIM  | PSNR   | SSIM  | PSNR          | SSIM         |
| Color image      | 0.10 | 19.439 | 0.360 | 16.785 | 0.185 | <u>25.564</u> | <u>0.772</u> | 21.598 | 0.496 | 23.164 | 0.616 | 17.354 | 0.259 | <b>26.124</b> | <b>0.814</b> |
| <i>Plane</i>     | 0.15 | 21.092 | 0.453 | 19.679 | 0.399 | <u>26.909</u> | <u>0.817</u> | 23.366 | 0.553 | 25.271 | 0.747 | 20.364 | 0.453 | <b>27.710</b> | <b>0.853</b> |
| (512 × 512 × 3)  | 0.20 | 22.505 | 0.535 | 21.854 | 0.521 | <u>27.875</u> | <u>0.848</u> | 24.941 | 0.640 | 27.158 | 0.825 | 21.532 | 0.499 | <b>28.798</b> | <b>0.874</b> |
| Color image      | 0.10 | 17.045 | 0.219 | 16.124 | 0.164 | <u>19.470</u> | <u>0.432</u> | 17.915 | 0.268 | 18.734 | 0.331 | 16.526 | 0.203 | <b>19.560</b> | <b>0.435</b> |
| <i>Baboon</i>    | 0.15 | 17.866 | 0.287 | 16.733 | 0.248 | <u>20.141</u> | <u>0.501</u> | 18.837 | 0.359 | 19.346 | 0.395 | 17.979 | 0.306 | <b>20.209</b> | <b>0.507</b> |
| (512 × 512 × 3)  | 0.20 | 18.558 | 0.353 | 18.126 | 0.339 | <u>20.758</u> | <u>0.562</u> | 19.426 | 0.422 | 19.949 | 0.470 | 18.710 | 0.378 | <b>20.785</b> | <b>0.563</b> |
| Color image      | 0.10 | 18.831 | 0.369 | 16.900 | 0.278 | <u>23.475</u> | <u>0.709</u> | 20.390 | 0.450 | 21.393 | 0.574 | 18.253 | 0.361 | <b>23.531</b> | <b>0.710</b> |
| <i>House</i>     | 0.15 | 20.230 | 0.459 | 19.516 | 0.438 | <u>24.515</u> | <u>0.765</u> | 22.032 | 0.562 | 22.719 | 0.676 | 19.533 | 0.464 | <b>24.567</b> | <b>0.771</b> |
| (512 × 512 × 3)  | 0.20 | 21.409 | 0.535 | 20.853 | 0.521 | <u>25.304</u> | <u>0.802</u> | 23.093 | 0.641 | 24.045 | 0.754 | 20.595 | 0.513 | <b>25.459</b> | <b>0.827</b> |
| Color image      | 0.10 | 19.471 | 0.362 | 17.839 | 0.216 | <u>26.334</u> | <u>0.735</u> | 21.854 | 0.495 | 25.213 | 0.672 | 16.871 | 0.172 | <b>26.781</b> | <b>0.778</b> |
| <i>Female</i>    | 0.15 | 21.370 | 0.455 | 20.580 | 0.349 | <u>27.602</u> | <u>0.777</u> | 23.704 | 0.603 | 26.864 | 0.749 | 19.508 | 0.382 | <b>28.304</b> | <b>0.817</b> |
| (256 × 256 × 3)  | 0.20 | 22.828 | 0.534 | 22.610 | 0.501 | <u>28.483</u> | <u>0.807</u> | 25.216 | 0.653 | 28.161 | 0.794 | 22.549 | 0.512 | <b>29.204</b> | <b>0.839</b> |
| MSI              | 0.10 | 20.787 | 0.592 | 15.324 | 0.093 | <u>27.146</u> | <u>0.857</u> | 23.105 | 0.740 | 23.748 | 0.658 | 17.327 | 0.323 | <b>27.318</b> | <b>0.868</b> |
| <i>Toy</i>       | 0.15 | 22.657 | 0.660 | 18.184 | 0.407 | <u>29.066</u> | <u>0.895</u> | 25.477 | 0.803 | 26.312 | 0.746 | 18.947 | 0.500 | <b>29.347</b> | <b>0.911</b> |
| (256 × 256 × 31) | 0.20 | 24.516 | 0.735 | 20.262 | 0.536 | <u>30.155</u> | <u>0.918</u> | 27.592 | 0.860 | 27.438 | 0.825 | 21.718 | 0.439 | <b>30.501</b> | <b>0.938</b> |
| MSI              | 0.10 | 24.863 | 0.604 | 20.147 | 0.173 | <u>31.501</u> | <u>0.863</u> | 28.111 | 0.776 | 28.828 | 0.714 | 20.899 | 0.305 | <b>32.128</b> | <b>0.897</b> |
| <i>Flowers</i>   | 0.15 | 26.837 | 0.676 | 22.091 | 0.350 | <u>32.980</u> | <u>0.898</u> | 30.039 | 0.839 | 31.352 | 0.815 | 22.456 | 0.331 | <b>34.178</b> | <b>0.933</b> |
| (256 × 256 × 31) | 0.20 | 28.144 | 0.739 | 26.360 | 0.637 | <u>34.055</u> | <u>0.919</u> | 30.993 | 0.871 | 32.814 | 0.895 | 26.029 | 0.614 | <b>34.930</b> | <b>0.943</b> |
| MSI              | 0.10 | 17.805 | 0.247 | 14.499 | 0.119 | <u>22.595</u> | <u>0.625</u> | 19.461 | 0.386 | 20.222 | 0.483 | 16.542 | 0.275 | <b>22.964</b> | <b>0.707</b> |
| <i>Beads</i>     | 0.15 | 18.793 | 0.322 | 15.153 | 0.170 | <u>23.848</u> | <u>0.703</u> | 20.815 | 0.500 | 22.593 | 0.623 | 17.477 | 0.311 | <b>24.334</b> | <b>0.773</b> |
| (256 × 256 × 31) | 0.20 | 19.659 | 0.391 | 17.766 | 0.316 | <u>25.002</u> | <u>0.759</u> | 22.001 | 0.587 | 24.284 | 0.726 | 17.915 | 0.300 | <b>25.602</b> | <b>0.820</b> |
| MSI              | 0.10 | 21.588 | 0.561 | 17.352 | 0.140 | <u>27.777</u> | <u>0.860</u> | 24.053 | 0.732 | 24.929 | 0.678 | 18.150 | 0.325 | <b>28.547</b> | <b>0.911</b> |
| <i>Feathers</i>  | 0.15 | 23.445 | 0.655 | 20.945 | 0.505 | <u>29.266</u> | <u>0.892</u> | 25.871 | 0.783 | 27.058 | 0.780 | 19.327 | 0.289 | <b>31.242</b> | <b>0.941</b> |
| (256 × 256 × 31) | 0.20 | 24.879 | 0.722 | 21.310 | 0.362 | <u>30.735</u> | <u>0.918</u> | 27.443 | 0.840 | 28.540 | 0.819 | 22.765 | 0.603 | <b>32.704</b> | <b>0.957</b> |
| MSI              | 0.10 | 20.623 | 0.296 | 17.160 | 0.112 | <u>25.616</u> | <u>0.664</u> | 21.950 | 0.407 | 23.153 | 0.489 | 19.555 | 0.359 | <b>25.836</b> | <b>0.723</b> |
| <i>PaviaU</i>    | 0.15 | 21.535 | 0.365 | 17.759 | 0.176 | <u>26.751</u> | <u>0.727</u> | 23.167 | 0.503 | 25.585 | 0.682 | 20.614 | 0.412 | <b>27.220</b> | <b>0.788</b> |
| (256 × 256 × 80) | 0.20 | 22.613 | 0.440 | 20.659 | 0.330 | <u>27.820</u> | <u>0.774</u> | 24.415 | 0.579 | 27.248 | 0.753 | 21.179 | 0.437 | <b>28.452</b> | <b>0.831</b> |

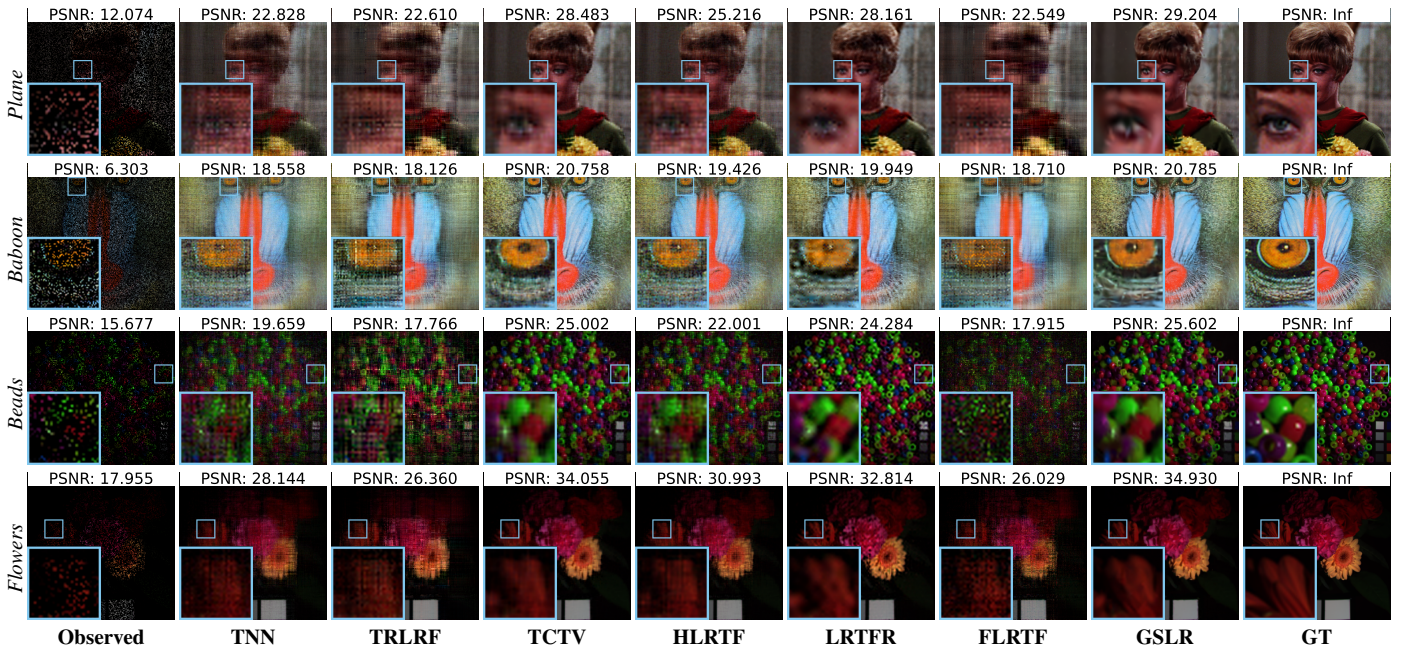

Figure 6. Reconstructed results and zoomed-in details by different methods under the tube missing (SR = 0.20).

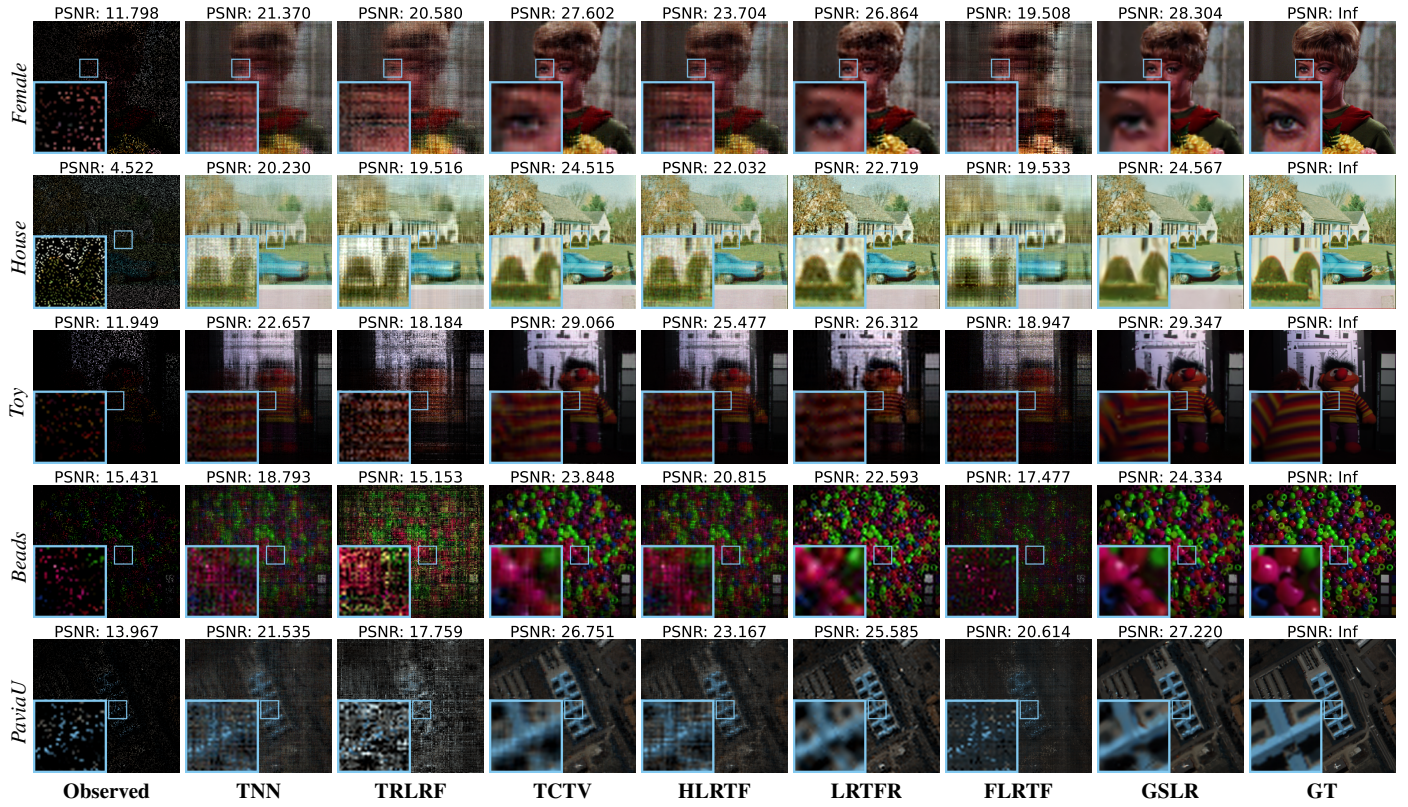

Figure 7. Reconstructed results and zoomed-in details by different methods under the tube missing (SR = 0.15).

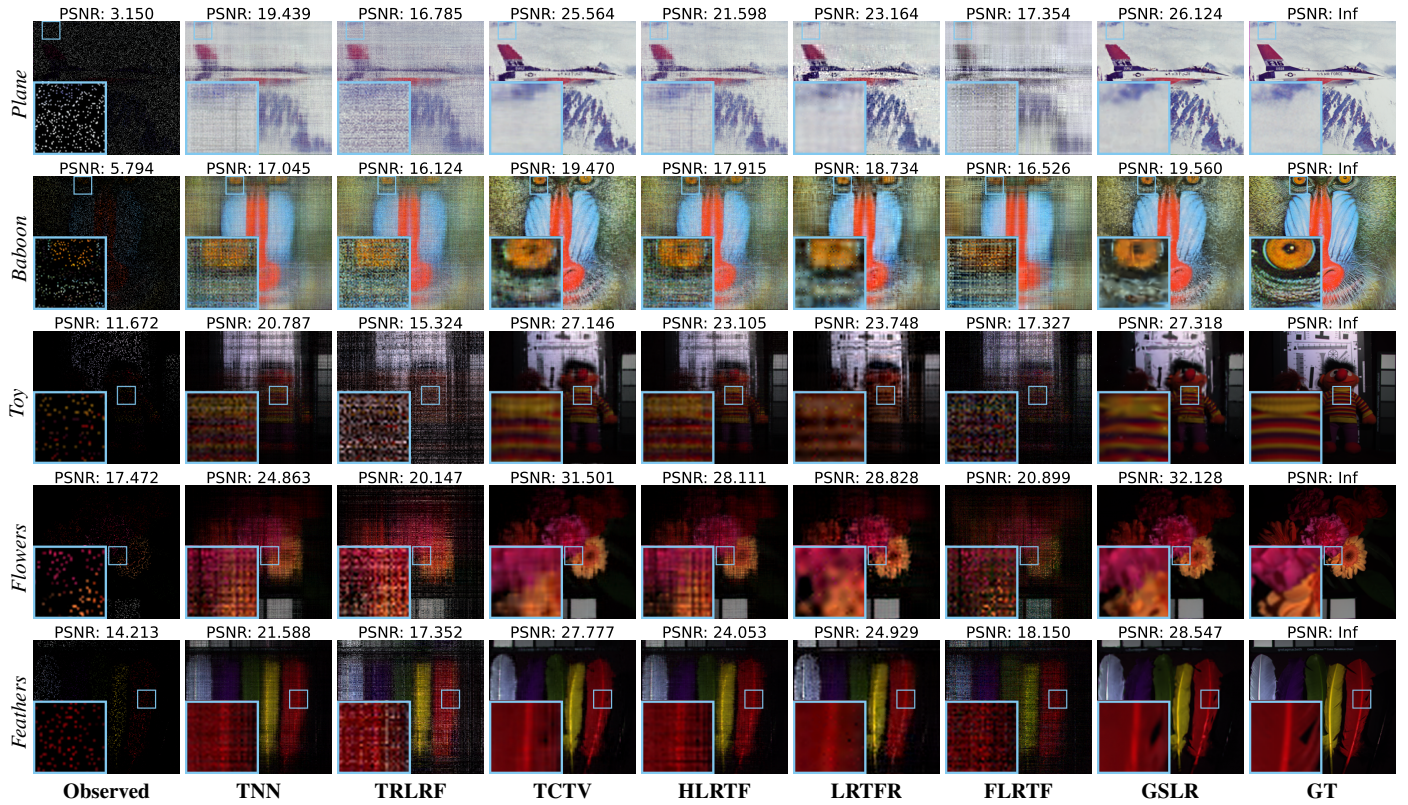

Figure 8. Reconstructed results and zoomed-in details by different methods under the tube missing (SR = 0.10).
